# Supplementary material for: Targeted esterase-induced dye (TED) loading supports direct calcium imaging in eukaryotic cell-free systems
Source: Royal Society of Chemistry journal article supplement (doi:10.1039/d0ra08397f), 2021-01-01
Supplement: d0ra08397f1.xlsx [file d0ra08397f1.xlsx]

## Sheet: esterase assay
		NTC	mCES2			NTC	mCES2
		102.23	227.121		Number of values	6	6
		98.6249	194.16
		102.23	188.495		Minimum	97.6	185.9
		100.17	195.19		25% Percentile	98.37	187.5
		99.14	187.98		Median	99.66	191.3
		97.595	185.92		75% Percentile	102.2	203.2
					Maximum	102.2	227.1
									Parameter
					Mean	100	196.5		Table Analyzed	esterase assay fig 1
					Std. Deviation	1.918	15.45		Column A	NTC
					Std. Error	0.7829	6.307		vs	vs
									Column B	mCES2
					Lower 95% CI of mean	97.99	180.3
					Upper 95% CI of mean	102	212.7		Unpaired t test
									P value	< 0.0001
					KS normality test				P value summary	***
					KS distance	0.211	0.3665		Are means signif. different? (P < 0.05)	Yes
					P value	> 0.10	0.0115		One- or two-tailed P value?	Two-tailed
					Passed normality test (alpha=0.05)?	Yes	No		t, df	t=15.18 df=10
					P value summary	ns	*
									How big is the difference?
					D'Agostino & Pearson omnibus normality test				Mean ± SEM of column A	100.0 ± 0.7829 N=6
					K2	N too small	N too small		Mean ± SEM of column B	196.5 ± 6.307 N=6
					P value				Difference between means	-96.48 ± 6.356
					Passed normality test (alpha=0.05)?				95% confidence interval	-110.6 to -82.32
					P value summary				R squared	0.9584
					Shapiro-Wilk normality test				F test to compare variances
					W	N too small	N too small		F,DFn, Dfd	64.90, 5, 5
					P value				P value	0.0003
					Passed normality test (alpha=0.05)?				P value summary	***
					P value summary				Are variances significantly different?	Yes
					Sum	600	1179

## Sheet: dye loading assay
					NTC- BLav	mCES2 - BLav
				Number of values	5	5			Parameter				Parameter
NTC- BLav	mCES2 - BLav								Table Analyzed	fluorescence assay			Table Analyzed	fluorescence assay
22873.2	65620.2			Minimum	18748	58844			Column A	NTC- BLav			Column A	NTC- BLav
21445.2	58844.2			25% Percentile	19204	59483			vs	vs			vs	vs
19659.2	60121.2			Median	21445	65272			Column B	mCES2 - BLav			Column B	mCES2 - BLav
18748.2	71049.2			75% Percentile	23422	68335
23971.2	65272.2			Maximum	23971	71049			Mann Whitney test				Unpaired t test
									P value	0.0079			P value	< 0.0001
				Mean	21339	64181			Exact or approximate P value?	Exact			P value summary	***
				Std. Deviation	2170	4884			P value summary	**			Are means signif. different? (P < 0.05)	Yes
				Std. Error	970.2	2184			Are medians signif. different? (P < 0.05)	Yes			One- or two-tailed P value?	Two-tailed
									One- or two-tailed P value?	Two-tailed			t, df	t=17.93 df=8
				Lower 95% CI of mean	18646	58118			Sum of ranks in column A,B	15 , 40
				Upper 95% CI of mean	24033	70245			Mann-Whitney U	0			How big is the difference?
													Mean ± SEM of column A	21340 ± 970.2 N=5
				KS normality test									Mean ± SEM of column B	64180 ± 2184 N=5
				KS distance	0.1806	0.1971							Difference between means	-42840 ± 2390
				P value	> 0.10	> 0.10							95% confidence interval	-48350 to -37330
				Passed normality test (alpha=0.05)?	Yes	Yes							R squared	0.9757
				P value summary	ns	ns
													F test to compare variances
				D'Agostino & Pearson omnibus normality test									F,DFn, Dfd	5.067, 4, 4
				K2	N too small	N too small							P value	0.1451
				P value									P value summary	ns
				Passed normality test (alpha=0.05)?									Are variances significantly different?	No
				P value summary
				Shapiro-Wilk normality test
				W	N too small	N too small
				P value
				Passed normality test (alpha=0.05)?
				P value summary
				Sum	106697	320907

## Sheet: SERCA assay 
	Table Analyzed	serca assay		Mean	2639	602.8
	Column A	after atp		Std. Deviation	880.6	278.9		after atp	before atp
	vs	vs		Std. Error	278.5	98.59		1620.58	512.407
	Column B	before atp						1368.38	827.441
				Lower 95% CI of mean	2009	369.7		2571.33	392.292
	Mann Whitney test			Upper 95% CI of mean	3269	835.9		2141.52	373.299
	P value	0.0004						2072.71	470.598
	Exact or approximate P value?	Gaussian Approximation		KS normality test				3519.67	449.622
	P value summary	***		KS distance	0.1622	0.2521		2722.62	604.357
	Are medians signif. different? (P < 0.05)	Yes		P value	> 0.10	> 0.10		3549.93	1192.5
	One- or two-tailed P value?	Two-tailed		Passed normality test (alpha=0.05)?	Yes	Yes		2722.62
	Sum of ranks in column A,B	135 , 36		P value summary	ns	ns		4100.31
	Mann-Whitney U	0
				D'Agostino & Pearson omnibus normality test
				K2	0.4297	7.028
				P value	0.8067	0.0298
				Passed normality test (alpha=0.05)?	Yes	No
				P value summary	ns	*
				Shapiro-Wilk normality test
				W	0.9609	0.807
				P value	0.7958	0.034
				Passed normality test (alpha=0.05)?	Yes	No
				P value summary	ns	*
				Sum	26390	4823

## Sheet: menthol TRPV3
			Parameter					Parameter						mCES2 at 3 min	mCES2 at 10 min	trpv3 mces2 3 min	trpv3 mces2 10 min
			Table Analyzed	menthol mCES2 and TPV3 mCES2 menthol				Table Analyzed	menthol mCES2 and TPV3 mCES2 menthol				Number of values	5	5	5	5
			Column B	mCES2 at 10 min				Column C	trpv3 mces2 3 min
			vs	vs				vs	vs				Minimum	95.56	96.13	97.21	80.34
			Column D	trpv3 mces2 10 min				Column D	trpv3 mces2 10 min				25% Percentile	96.81	96.76	98.64	80.74
													Median	100.3	101	100.6	82.68
			Unpaired t test					Paired t test					75% Percentile	101.8	101.4	101	83.49
			P value	< 0.0001				P value	< 0.0001				Maximum	102.7	101.4	101	83.8
			P value summary	***				P value summary	***
			Are means signif. different? (P < 0.05)	Yes				Are means signif. different? (P < 0.05)	Yes				Mean	99.53	99.44	99.97	82.23
			One- or two-tailed P value?	Two-tailed				One- or two-tailed P value?	Two-tailed				Std. Deviation	2.769	2.5	1.586	1.444
			t, df	t=13.34 df=8				t, df	t=35.58 df=4				Std. Error	1.238	1.118	0.7093	0.6456
								Number of pairs	5
			How big is the difference?										Lower 95% CI of mean	96.09	96.34	98	80.44
			Mean ± SEM of column B	99.44 ± 1.118 N=5				How big is the difference?					Upper 95% CI of mean	103	102.5	101.9	84.02
			Mean ± SEM of column D	82.23 ± 0.6456 N=5				Mean of differences	17.74
			Difference between means	17.22 ± 1.291				95% confidence interval	16.35 to 19.12				KS normality test
			95% confidence interval	14.24 to 20.19				R squared	0.9968				KS distance	0.214	0.3317	0.3264	0.2221
			R squared	0.957									P value	> 0.10	0.0757	0.0876	> 0.10
								How effective was the pairing?					Passed normality test (alpha=0.05)?	Yes	Yes	Yes	Yes
			F test to compare variances					Correlation coefficient (r)	0.733				P value summary	ns	ns	ns	ns
			F,DFn, Dfd	2.998, 4, 4				P Value (one tailed)	0.0794
			P value	0.3127				P value summary	ns				D'Agostino & Pearson omnibus normality test
			P value summary	ns				Was the pairing significantly effective?	No				K2	N too small	N too small	N too small	N too small
			Are variances significantly different?	No									P value
													Passed normality test (alpha=0.05)?
													P value summary
			mCES2 at 3 min	mCES2 at 10 min	trpv3 mces2 3 min	trpv3 mces2 10 min
			102.674	101.402	101.031	83.7972							Shapiro-Wilk normality test
			101.02	97.3835	97.2094	80.3404							W	N too small	N too small	N too small	N too small
			100.329	101.322	100.919	82.6785							P value
			98.0466	100.99	100.072	83.1907							Passed normality test (alpha=0.05)?
			95.5645	96.1276	100.605	81.1416							P value summary
													Sum	497.6	497.2	499.8	411.1

## Sheet: cap and cpz figure
			CAP at 3 min	CAP at 10 min	CAP + CPZ at 3 min	CAP +CPZ 10 min				CAP at 3 min	CAP at 10 min	CAP + CPZ at 3 min	CAP +CPZ 10 min
			100.497	94.5435	100.633	98.7592			Number of values	6	6	8	8
			99.6464	96.2696	95.35	101.916
			99.713	96.2746	95.35	106.823			Minimum	99.65	82.92	95.35	95.8
			100.24	82.9204	100	95.8392			25% Percentile	99.7	83.17	96.24	95.81
			101	93.6	98.9033	95.8			Median	100.2	94.07	99.95	98.83
			100.233	83.2469	100.2	95.8			75% Percentile	100.6	96.27	100.1	101.2
					100	98.9			Maximum	101	96.27	100.6	106.8
					99.9	99.1
									Mean	100.2	91.14	98.79	99.12
	Parameter								Std. Deviation	0.5044	6.327	2.179	3.782		Parameter
	Table Analyzed	and hTRPV1 mCES2 CAPand CPZ							Std. Error	0.2059	2.583	0.7703	1.337		Table Analyzed	caffeine 10 micro M and 100 nM
	Column A	CAP at 3 min													Column B	100 µM caffeine
	vs	vs							Lower 95% CI of mean	99.69	84.5	96.97	95.96		vs	vs
	Column B	CAP at 10 min							Upper 95% CI of mean	100.8	97.78	100.6	102.3		Column C	10 mM caffeine
	Paired t test								KS normality test						Mann Whitney test
	P value	0.0182							KS distance	0.1767	0.3178	0.3195	0.2518		P value	0.0247
	P value summary	*							P value	> 0.10	0.0583	0.0159	> 0.10		Exact or approximate P value?	Gaussian Approximation
	Are means signif. different? (P < 0.05)	Yes							Passed normality test (alpha=0.05)?	Yes	Yes	No	Yes		P value summary	*
	One- or two-tailed P value?	Two-tailed							P value summary	ns	ns	*	ns		Are medians signif. different? (P < 0.05)	Yes
	t, df	t=3.453 df=5													One- or two-tailed P value?	Two-tailed
	Number of pairs	6							D'Agostino & Pearson omnibus normality test						Sum of ranks in column B,C	44 , 11
									K2	N too small	N too small	2.755	4.408		Mann-Whitney U	1
	How big is the difference?								P value			0.2522	0.1104
	Mean of differences	9.079							Passed normality test (alpha=0.05)?			Yes	Yes
	95% confidence interval	2.320 to 15.84							P value summary			ns	ns
	R squared	0.7046
									Shapiro-Wilk normality test
	How effective was the pairing?								W	N too small	N too small	0.731	0.8421
	Correlation coefficient (r)	-0.1852							P value			0.005	0.0792
	P Value (one tailed)	0.3627							Passed normality test (alpha=0.05)?			No	Yes
	P value summary	ns							P value summary			**	ns
	Was the pairing significantly effective?	No
									Sum	601.3	546.9	790.3	792.9

## Sheet: CAP mces2 and trpv1mces2
			mCES2 at 3 min	mCES2 at 10 min	htrpv1 mces2 3 min	h trpv1, mCES2 10 min				mCES2 at 3 min	mCES2 at 10 min	htrpv1 mces2 3 min	h trpv1, mCES2 10 min
			100.901	100.805	101.031	83.7972			Number of values	6	6	5	5
			104.3	103.676	97.2094	80.3404
			100.159	100.461	100.919	82.6785			Minimum	99.09	100.5	97.21	80.34
			99.0907	100.924	100.072	83.1907			25% Percentile	99.77	100.7	98.64	80.74
			104.608	101.3	100.605	81.1416			Median	100.5	101.1	100.6	82.68
			100	200					75% Percentile	104.4	127.8	101	83.49
									Maximum	104.6	200	101	83.8
									Mean	101.5	117.9	99.97	82.23
	Parameter								Std. Deviation	2.354	40.26	1.586	1.444
	Table Analyzed	mCES2 and hTRPV1 mCES2 10 µM CAP							Std. Error	0.9611	16.43	0.7093	0.6456
	Column B	mCES2 at 10 min
	vs	vs							Lower 95% CI of mean	99.04	75.61	98	80.44
	Column D	h trpv1, mCES2 10 min							Upper 95% CI of mean	104	160.1	101.9	84.02
	Mann Whitney test								KS normality test
	P value	0.0043							KS distance	0.2687	0.471	0.3264	0.2221
	Exact or approximate P value?	Exact							P value	> 0.10	0.0001	0.0876	> 0.10
	P value summary	**							Passed normality test (alpha=0.05)?	Yes	No	Yes	Yes
	Are medians signif. different? (P < 0.05)	Yes							P value summary	ns	***	ns	ns
	One- or two-tailed P value?	Two-tailed
	Sum of ranks in column B,D	51 , 15							D'Agostino & Pearson omnibus normality test
	Mann-Whitney U	0							K2	N too small	N too small	N too small	N too small
									P value
									Passed normality test (alpha=0.05)?
									P value summary
	Parameter
	Table Analyzed	mCES2 and hTRPV1 mCES2 10 µM CAP							Shapiro-Wilk normality test
	Column C	htrpv1 mces2 3 min							W	N too small	N too small	N too small	N too small
	vs	vs							P value
	Column D	h trpv1, mCES2 10 min							Passed normality test (alpha=0.05)?
									P value summary
	Paired t test
	P value	< 0.0001							Sum	609.1	707.2	499.8	411.1
	P value summary	***
	Are means signif. different? (P < 0.05)	Yes
	One- or two-tailed P value?	Two-tailed
	t, df	t=35.58 df=4
	Number of pairs	5
	How big is the difference?
	Mean of differences	17.74
	95% confidence interval	16.35 to 19.12
	R squared	0.9968
	How effective was the pairing?
	Correlation coefficient (r)	0.733
	P Value (one tailed)	0.0794
	P value summary	ns
	Was the pairing significantly effective?	No

## Sheet: Caffeine comparison plot 
			baseline	100 µM caffeine
			102.839	94.2886
			101.26	97.3749
			99.5071	89.7447					Parameter				Parameter
			99.5071	97.3749					Table Analyzed	caffeine 10 micro M and 100 nM			Table Analyzed	caffeine 10 micro M and 100 nM
			99.3905	96.1057					Column A	baseline			Column A	baseline
			100.902	96.5895					vs	vs			vs	vs
									Column B	100 µM caffeine			Column C	10 mM caffeine
				baseline	100 µM caffeine	10 mM caffeine			Wilcoxon signed rank test				Wilcoxon signed rank test
									P value	0.0313			P value	0.125
									Exact or approximate P value?	Exact			Exact or approximate P value?	Exact
			Minimum	99.39	89.74	78.74			P value summary	*			P value summary	ns
			25% Percentile	99.48	93.15	79.95			Are medians signif. different? (P < 0.05)	Yes			Are medians signif. different? (P < 0.05)	No
			Median	100.2	96.35	85.99			One- or two-tailed P value?	Two-tailed			One- or two-tailed P value?	Two-tailed
			75% Percentile	101.7	97.37	90.14			Sum of positive, negative ranks	21.00 , 0.0000			Sum of positive, negative ranks	10.00 , 0.0000
			Maximum	102.8	97.37	90.73			Sum of signed ranks (W)	21			Sum of signed ranks (W)	10
			Mean	100.6	95.25	85.36			How effective was the pairing?				How effective was the pairing?
			Std. Deviation	1.37	2.925	5.319			rs (Spearman)	0.0735			rs (Spearman)	0.7379
			Std. Error	0.5594	1.194	2.659			P Value (one tailed)	0.4597			P Value (one tailed)	0.1667
									P value summary	ns			P value summary	ns
			Lower 95% CI of mean	99.13	92.18	76.9			Was the pairing significantly effective?	No			Was the pairing significantly effective?	No
			Upper 95% CI of mean	102	98.32	93.82
			KS normality test
			KS distance	0.2805	0.2822	N too small
			P value	> 0.10	> 0.10				Parameter
			Passed normality test (alpha=0.05)?	Yes	Yes				Table Analyzed	caffeine 10 micro M and 100 nM
			P value summary	ns	ns				Column B	100 µM caffeine
									vs	vs
			D'Agostino & Pearson omnibus normality test						Column C	10 mM caffeine
			K2	N too small	N too small	N too small
			P value						Mann Whitney test
			Passed normality test (alpha=0.05)?						P value	0.0247
			P value summary						Exact or approximate P value?	Gaussian Approximation
									P value summary	*
			Shapiro-Wilk normality test						Are medians signif. different? (P < 0.05)	Yes
			W	N too small	N too small	N too small			One- or two-tailed P value?	Two-tailed
			P value						Sum of ranks in column B,C	44 , 11
			Passed normality test (alpha=0.05)?						Mann-Whitney U	1
			P value summary
			Sum	603.4	571.5	341.4

## Sheet: dantolene and caffeine
										1 mM caffeine at 3 min	1 mM caffeine at 10 min	caffeine + dantrolen3 min	caffeine + dantrolene 10 min			Parameter
									Number of values	5	5	4	4			Table Analyzed	caffeine + dantrolene
			1 mM caffeine at 3 min	1 mM caffeine at 10 min	caffeine + dantrolen3 min	caffeine + dantrolene 10 min										Column A	1 mM caffeine at 3 min
			98.9	90.7	97.5	100			Minimum	98.9	81.7	96.9	98			vs	vs
			102.3	82.8	99.6	100.5			25% Percentile	100.4	82.25	97.05	98.5			Column B	1 mM caffeine at 10 min
			102	83.3	96.9	98			Median	102	83.3	98.55	100.3
			109.5	86.3	103	101.1			75% Percentile	105.9	88.5	102.2	101			Paired t test
			101.8	81.7					Maximum	109.5	90.7	103	101.1			P value	0.0022
																P value summary	**
									Mean	102.9	84.96	99.25	99.9			Are means signif. different? (P < 0.05)	Yes
									Std. Deviation	3.935	3.633	2.755	1.344			One- or two-tailed P value?	Two-tailed
									Std. Error	1.76	1.625	1.377	0.6721			t, df	t=7.031 df=4
	Parameter															Number of pairs	5
	Table Analyzed	caffeine + dantrolene							Lower 95% CI of mean	98.01	80.45	94.87	97.76
	Column B	1 mM caffeine at 10 min							Upper 95% CI of mean	107.8	89.47	103.6	102			How big is the difference?
	vs	vs														Mean of differences	17.94
	Column D	caffeine + dantrolene 10 min							KS normality test							95% confidence interval	10.86 to 25.02
									KS distance	0.3606	0.2761	N too small	N too small			R squared	0.9251
	Mann Whitney test								P value	0.0324	> 0.10
	P value	0.0159							Passed normality test (alpha=0.05)?	No	Yes					How effective was the pairing?
	Exact or approximate P value?	Exact							P value summary	*	ns					Correlation coefficient (r)	-0.1354
	P value summary	*														P Value (one tailed)	0.4141
	Are medians signif. different? (P < 0.05)	Yes							D'Agostino & Pearson omnibus normality test							P value summary	ns
	One- or two-tailed P value?	Two-tailed							K2	N too small	N too small	N too small	N too small			Was the pairing significantly effective?	No
	Sum of ranks in column B,D	15 , 30							P value
	Mann-Whitney U	0							Passed normality test (alpha=0.05)?
									P value summary
									Shapiro-Wilk normality test
									W	N too small	N too small	N too small	N too small
									P value
									Passed normality test (alpha=0.05)?
									P value summary
									Sum	514.5	424.8	397	399.6
