# Supplementary material for: Targeted esterase-induced dye (TED) loading supports direct calcium imaging in eukaryotic cell-free systems
Source: Royal Society of Chemistry journal article supplement (doi:10.1039/d0ra08397f), 2021-01-01
Supplement: d0ra08397f2.pdf [file d0ra08397f2.pdf]

**SUPPLEMENTARY DATA:**

| mCES2 samples |          |          |          |          |          |          |
|---------------|----------|----------|----------|----------|----------|----------|
|               | 30 ng    |          | 60 ng    |          | 120 ng   |          |
| Time (sec)    | average  | S.E.M    | average  | S.E.M    | average  | S.E.M    |
| 0             | 0.000000 | 0.000000 | 0.000000 | 0.000000 | 0.000000 | 0.000000 |
| 10            | 0.025467 | 0.000720 | 0.051200 | 0.002265 | 0.097800 | 0.003859 |
| 20            | 0.043867 | 0.001785 | 0.093000 | 0.002868 | 0.167533 | 0.004907 |
| 30            | 0.062200 | 0.003559 | 0.120333 | 0.001785 | 0.211867 | 0.006706 |
| 40            | 0.082533 | 0.000720 | 0.145667 | 0.013411 | 0.289200 | 0.003266 |
| 50            | 0.102000 | 0.001633 | 0.171267 | 0.014350 | 0.329000 | 0.005354 |
| 60            | 0.101467 | 0.000544 | 0.201867 | 0.014631 | 0.340467 | 0.001361 |
|               |          |          |          |          |          |          |
| NTC samples   |          |          |          |          |          |          |
|               | 30 ng    |          | 60 ng    |          | 120 ng   |          |
| Time (sec)    | average  | S.E.M    | average  | S.E.M    | average  | S.E.M    |
| 0             | 0.000000 | 0.000000 | 0.000000 | 0.000000 | 0.000000 | 0.000000 |
| 10            | 0.015133 | 0.002880 | 0.023467 | 0.005761 | 0.069133 | 0.001515 |
| 20            | 0.029200 | 0.001247 | 0.064200 | 0.003399 | 0.131867 | 0.004481 |
| 30            | 0.037867 | 0.003954 | 0.091533 | 0.001785 | 0.176867 | 0.003839 |
| 40            | 0.054867 | 0.004119 | 0.118867 | 0.004907 | 0.231533 | 0.003067 |
| 50            | 0.077333 | 0.003839 | 0.143667 | 0.004380 | 0.284333 | 0.002373 |
| 60            | 0.072800 | 0.000817 | 0.153467 | 0.005664 | 0.306467 | 0.003345 |

**Table 1:** Esterase activity of mCES2 (mouse Carboxyl Esterase 2) and NTC (Non-Template Control) samples using PNPA method. Data table of Fig 3 c representing time dependent and dose-dependent curve shown above as absorbance at 410 nm, n=3.

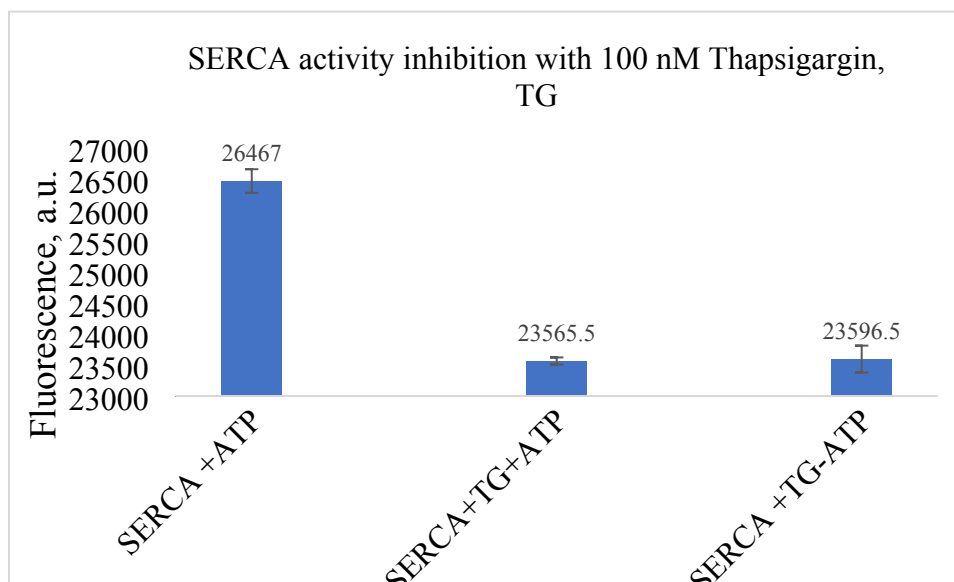

**Figure1:** SERCA activity measured by fluorescence spectroscopy: Fluorescence activity measured with the mCES2 microsomes pre-loaded with Ca<sup>2+</sup> under different experimental conditions. SERCA activity in the presence of ATP (SERCA + ATP), SERCA activity in the presence of TG and ATP (SERCA +TG+ATP) and SERCA activity measured in the presence of 100 nM TG without any ATP (SERCA+TG-ATP), n=2, 10 µg of mCES2 protein each well, data represented mean +/- S.E.M. Clear inhibition of SERCA activity is observed with TG in samples with and without ATP.

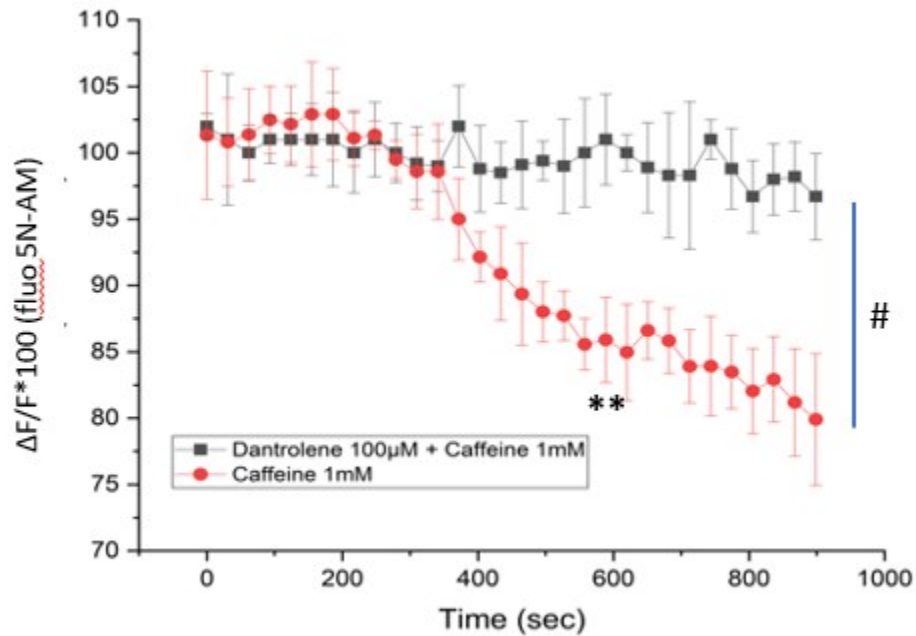

**Figure 2:** Inhibitory effects of dantrolene on caffeine induced calcium release via ryanodine receptor (RyR2) activation in *mCES2* microsomes, n=5 each. \*\* indicate significant difference of caffeine sample dataset before (150 s) and after adding caffeine (600 sec) with p value = 0.002, paired t test, two tailed. # indicate the significant difference between the two sample groups at 600 sec with p value = 0.0159, Mann Whitney test, two tailed. The fluorescence value is represented as  $\Delta F/F * 100$  of Fluo 5N-AM +/- S.E.M. All the samples were calcium loaded with ATP for 60 min, 37°C prior to caffeine and dantrolene experiments. For caffeine experiments, 1 mM caffeine was used for activation of ryanodine channel at 5 min. For inhibition experiments, the samples were pre-incubated with dantrolene minimum 20 min prior to start of the experiments and also additionally maintained in the baseline buffer from time 0 to 5 min. No calcium release induced by caffeine added at 5 min was observed in samples in the presence of dantrolene.

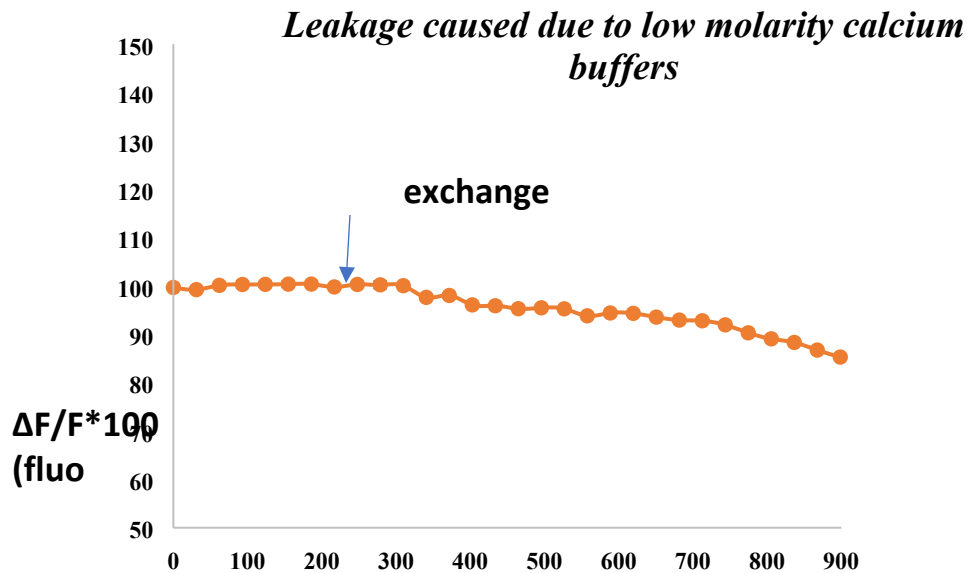

**Fig3:** Gradual leakage caused due to change in the buffer from 200 μM to 300 nM Ca<sup>2+</sup>, n=5; data represented mean +/- S.E.M.

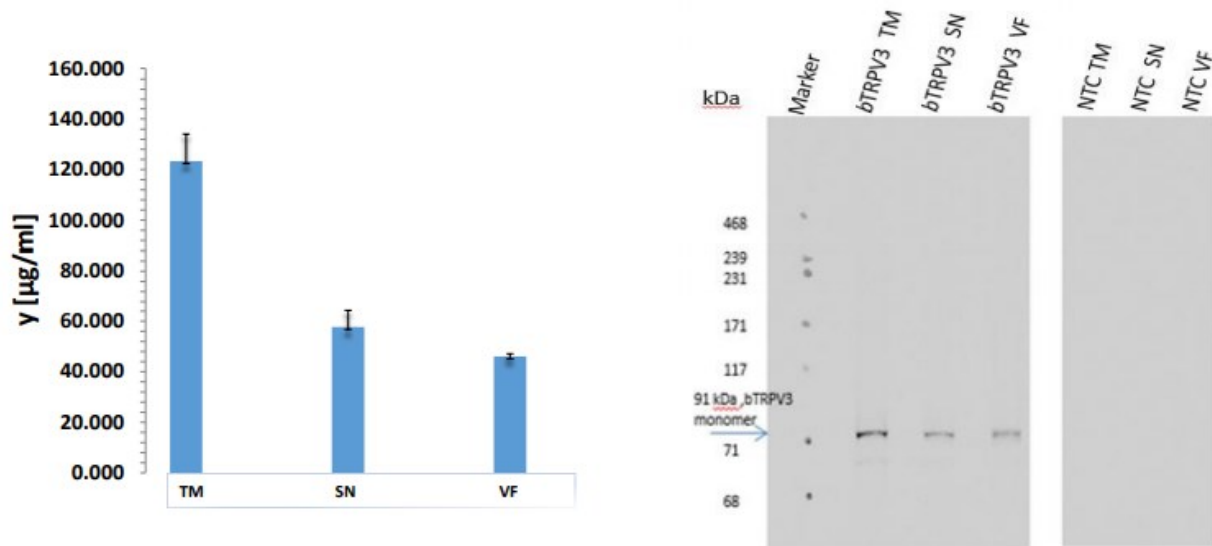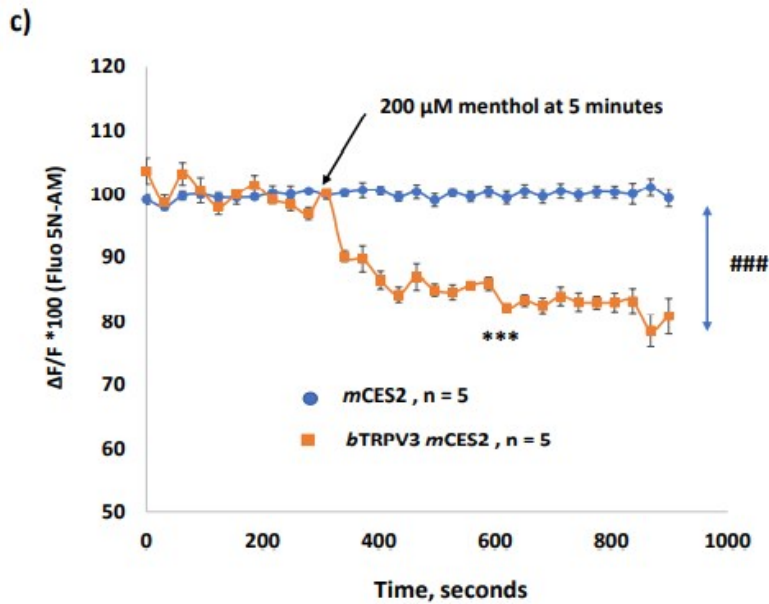

**Fig 4:** a) Protein yields of *bTRPV3*, bovine Transient Receptor Potential Channel Vanilloid Receptor member 3. by scintillation counting via CECF reaction for 24 h, 27 °C in *Sf21* system; suspension and pellet correspond to translation mix and vesicular fraction correspondingly. The plasmid construct was similar to *hTRPV1* construct as mentioned in this work. Data is represented as mean $\pm$  S.E.M, n = 3, TM- Translation mix, SN- Supernatant, VF- Vesicular fraction. b) Autoradiogram of proteins run on SDS MES gel, no band was observed in Non-template Control microsomes and 91 kDa protein was observed in *bTRPV3* samples; c) Calcium imaging of *mCES2* and *bTRPV3-mCES2* cell-free synthesized microsomes with menthol, 200  $\mu$ M for activation of *bTRPV3* functionality. Ca<sup>2+</sup> release was observed only in *bTRPV3-mCES2* microsomes, data is represented as deltaF/F \*100  $\pm$  S.E.M, of dye fluorescence, n=5 each. ### indicate the significant difference between the *mCES2* samples and *bTRPV3-mCES2* samples at 600 s, p value < 0.0001, unpaired t test, two tailed. \*\*\* indicate the significant difference of *bTRPV3-mCES2* sample data at 150 s and 600 s, before and after menthol addition, p < 0.0001, Paired t test, two tailed.
